# Supplementary material for: Caffeic acid phenethyl ester induced cell cycle arrest and growth inhibition in androgen-independent prostate cancer cells via regulation of Skp2, p53, p21Cip1 and p27Kip1
Source: PubMed Central journal article supplement (PMC4466643; doi:10.18632/oncotarget.3246), 2015-02-16
Supplement: oncotarget-06-6684-s001.pdf [file oncotarget-06-6684-s001.pdf]

## SUPPLEMENTARY FIGURES

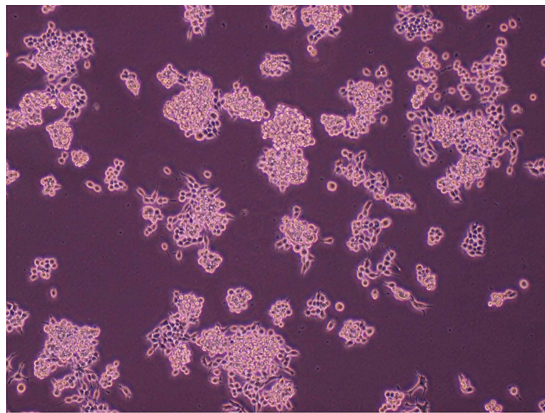

control

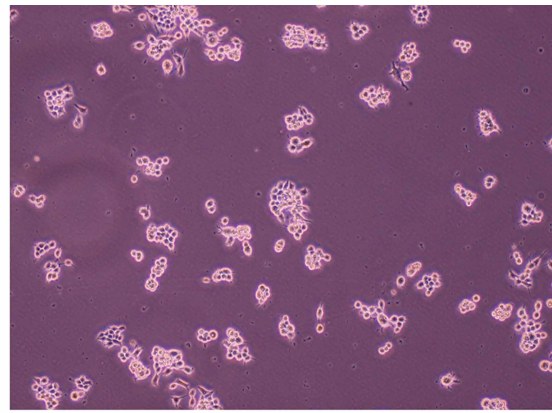

10  $\mu$ M CAPE

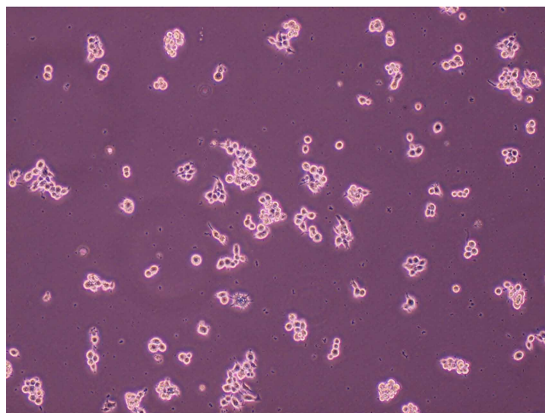

20  $\mu$ M CAPE

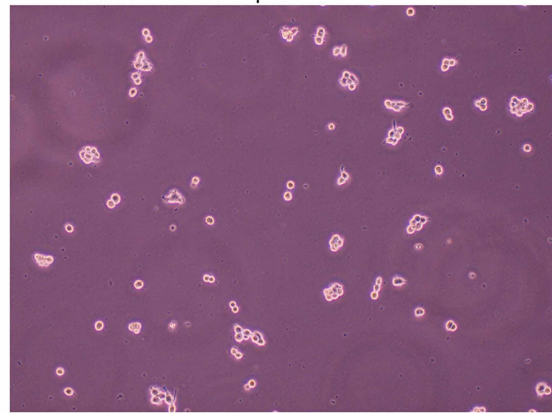

40  $\mu$ M CAPE

**Supplementary Figure 1: CAPE treatment for 96 h reduced cell number of LNCaP 104-R1 cells.** Images of LNCaP 104-R1 cells being treated with increasing concentrations of CAPE for 96 h were observed using light microscope with magnification of 100X.

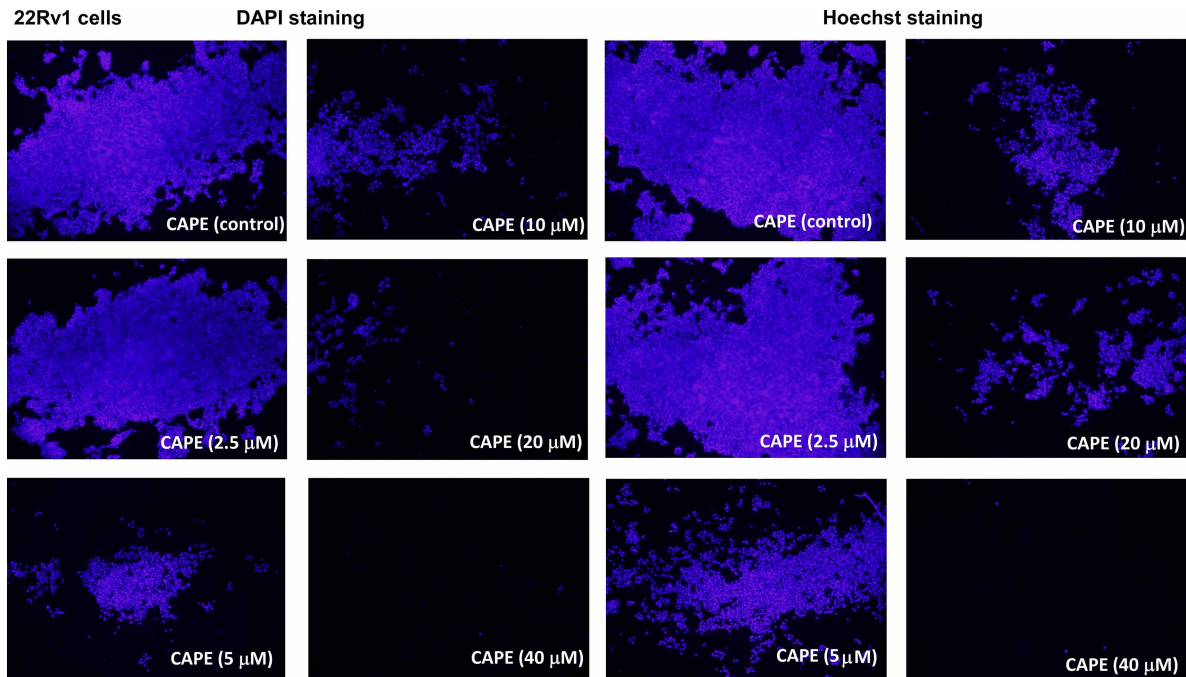

**Supplementary Figure 2: CAPE treatment for 96 h reduced cell proliferation of 22Rv1 cells.** DAPI staining and Hoechst dye-staining of 22Rv1 cells being treated with increasing concentrations of CAPE for 96 h was used to monitor cell proliferation of 22Rv1 cells using fluorescent microscope with magnification of 100X.

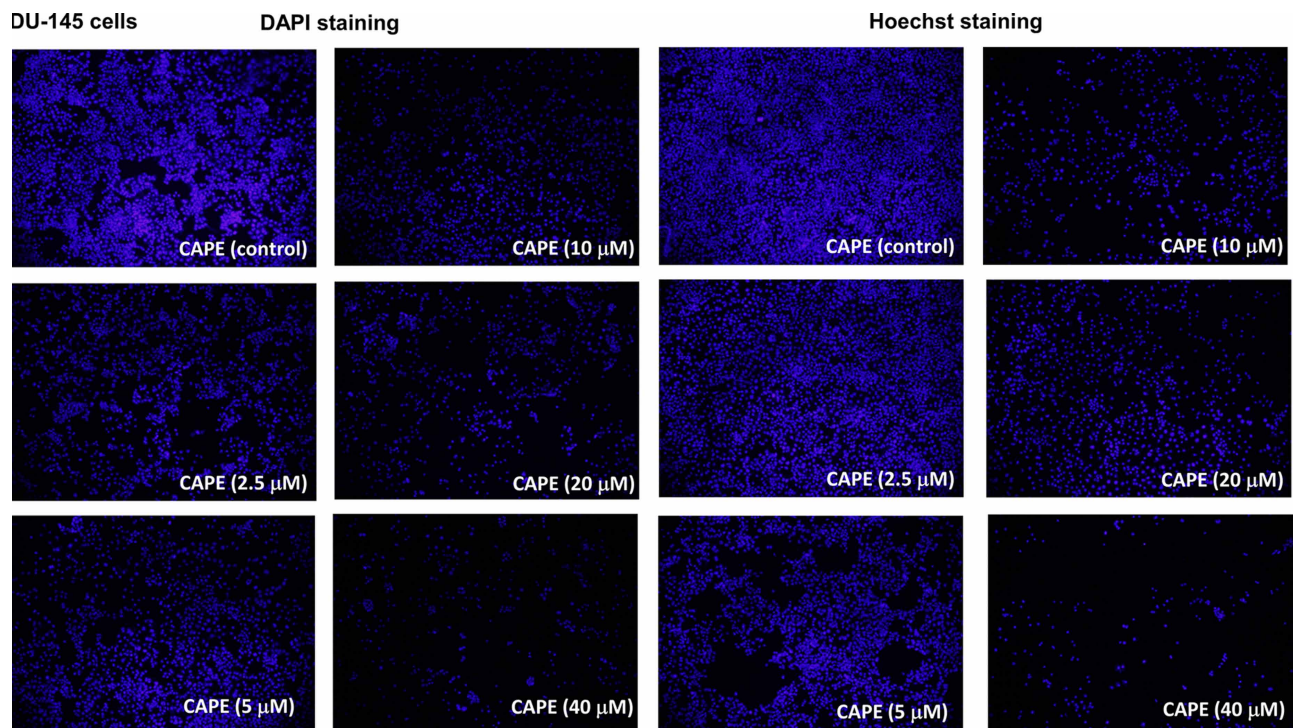

**Supplementary Figure 3: CAPE treatment for 96 h reduced cell proliferation of DU-145 cells.** DAPI staining and Hoechst dye-staining of DU-145 cells being treated with increasing concentrations of CAPE for 96 h was used to monitor cell proliferation of DU-145 cells using fluorescent microscope with magnification of 100X.

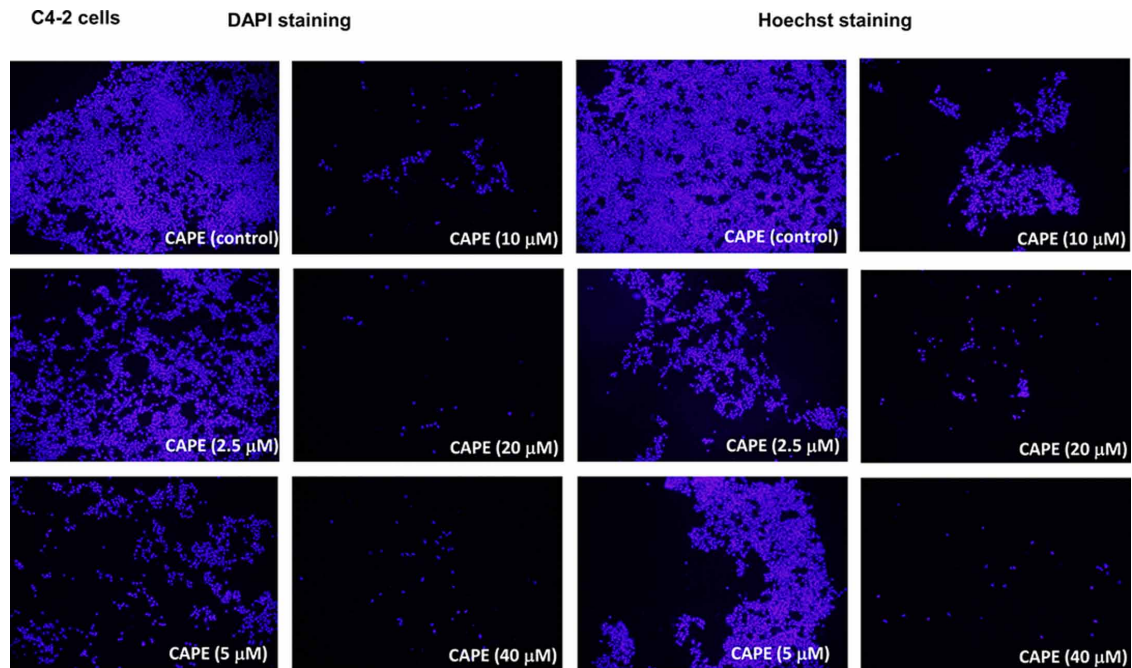

**Supplementary Figure 4: CAPE treatment for 96 h reduced cell proliferation of C4-2 cells.** DAPI staining and Hoechst dye-staining of C4-2 cells being treated with increasing concentrations of CAPE for 96 h was used to monitor cell proliferation of C4-2 cells using fluorescent microscope with magnification of 100X.

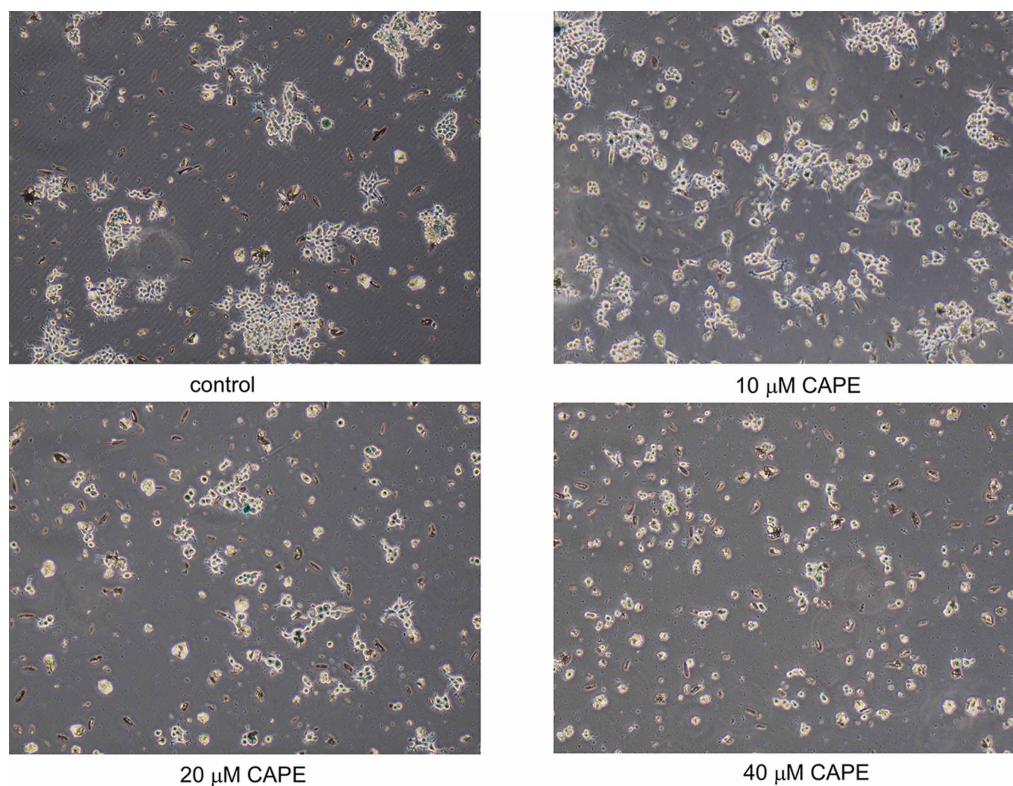

**Supplementary Figure 5: CAPE treatment induced moderate  $\beta$ -galactosidase staining in LNCaP 104-R1 cells as determined by  $\beta$ -galactosidase staining.** LNCaP 104-R1 cells were treated with 0, 10, 20, 40  $\mu$ M CAPE for 96 h. Expression of  $\beta$ -galactosidase was stained to determine if CAPE treatment causes cellular senescence and observed using light microscope with magnification of 100X.
